# Supplementary material for: Delineating Species with DNA Barcodes: A Case of Taxon Dependent Method Performance in Moths
Source: PLoS One. 2015 Apr 7;10(4):e0122481. doi: 10.1371/journal.pone.0122481 (PMC4406103; doi:10.1371/journal.pone.0122481)
Supplement: S1 Table — (XLSX) [file pone.0122481.s001.xlsx]

## Sheet: Sheet1
Subfamily	Identification	Sample ID	Process ID	Institution Storing	Country	GenBank
Gelechiinae	Altenia perspersella	MM06396	LEFID457-10	University of Oulu	Finland	HM873228
Gelechiinae	Altenia perspersella	MM03894	LEFIC367-10	University of Oulu	Finland	HM872210
Gelechiinae	Altenia perspersella	MM14043	LEFIG176-10	University of Oulu	Finland	HM875856
Gelechiinae	Aroga velocella	MM11947	LEFIF456-10	University of Oulu	Finland	HM875141
Gelechiinae	Aroga velocella	MM09036	LEFIE425-10	University of Oulu	Finland	HM874149
Gelechiinae	Aroga velocella	MM02598	LEFIB751-10	University of Oulu	Finland	HM871629
Gelechiinae	Aroga velocella	MM06571	LEFIJ093-10	University of Oulu	Finland	JF853440
Gelechiinae	Aroga velocella	MM14147	LEFIG236-10	University of Oulu	Finland	HM875915
Gelechiinae	Athrips amoenella	MM17716	LEFIK141-10	University of Oulu	Finland	JN270949
Gelechiinae	Athrips amoenella	MM17717	LEFIK142-10	University of Oulu	Finland	JN270950
Gelechiinae	Athrips mouffetella	MM05061	LEFIC849-10	University of Oulu	Finland	HM872667
Gelechiinae	Athrips mouffetella	MM09777	LEFIA899-10	University of Oulu	Finland	HM387035
Gelechiinae	Athrips mouffetella	MM09836	LEFIE736-10	University of Oulu	Finland	HM874456
Gelechiinae	Athrips pruinosella	MM04151	LEFIA797-10	University of Oulu	Finland	HM386938
Gelechiinae	Athrips pruinosella	MM03825	LEFIC321-10	University of Oulu	Finland	HM872165
Gelechiinae	Athrips tetrapunctella	MM03928	LEFIC390-10	University of Oulu	Finland	HM872233
Gelechiinae	Athrips tetrapunctella	MM02312	LEFIB598-10	University of Oulu	Finland	HM871477
Gelechiinae	Carpatolechia alburnella	MM03556	LEFIC195-10	University of Oulu	Finland	HM872039
Gelechiinae	Carpatolechia alburnella	MM09805	LEFIE716-10	University of Oulu	Finland	HM874436
Gelechiinae	Carpatolechia alburnella	MM12437	LEFIF591-10	University of Oulu	Finland	HM875275
Gelechiinae	Carpatolechia decorella	MM18941	LEFIL643-10	University of Oulu	France	KM373628
Gelechiinae	Carpatolechia epomidella	MM08264	LEFIE087-10	University of Oulu	Finland	HM873834
Gelechiinae	Carpatolechia epomidella	MM08285	LEFIE101-10	University of Oulu	Finland	HM873849
Gelechiinae	Carpatolechia epomidella	MM14048	LEFIG180-10	University of Oulu	Finland	HM875860
Gelechiinae	Carpatolechia fugitivella	MM15625	LEFIG761-10	University of Oulu	Finland	HM876414
Gelechiinae	Carpatolechia fugitivella	MM15624	LEFIG760-10	University of Oulu	Finland	HM876413
Gelechiinae	Carpatolechia fugitivella	MM12021	LEFIF475-10	University of Oulu	Finland	HM875160
Gelechiinae	Carpatolechia notatella	MM15974	LEFIJ373-10	University of Oulu	Finland	JF853560
Gelechiinae	Carpatolechia notatella	MM06130	LEFIA1038-10	University of Oulu	Finland	JF818730
Gelechiinae	Carpatolechia notatella	MM14223	LEFIG279-10	University of Oulu	Finland	HM875958
Gelechiinae	Carpatolechia proximella	MM06150	LEFID276-10	University of Oulu	Finland	HM873074
Gelechiinae	Carpatolechia proximella	MM03431	LEFIC107-10	University of Oulu	Finland	HQ570298
Gelechiinae	Carpatolechia proximella	MM00527	LEFIB145-10	University of Oulu	Finland	HM871050
Gelechiinae	Caryocolum amaurella	MM13561	LEFIF976-10	University of Oulu	Finland	HM875657
Gelechiinae	Caryocolum amaurella	MM13564	LEFIF979-10	University of Oulu	Finland	HM875660
Gelechiinae	Caryocolum amaurella	MM13562	LEFIF977-10	University of Oulu	Finland	HM875658
Gelechiinae	Caryocolum amaurella	MM12154	LEFIF522-10	University of Oulu	Finland	HM875207
Gelechiinae	Caryocolum amaurella	MM13563	LEFIF978-10	University of Oulu	Finland	HM875659
Gelechiinae	Caryocolum blandella	MM02608	LEFIB755-10	University of Oulu	Finland	HM871632
Gelechiinae	Caryocolum blandella	MM03533	LEFIC179-10	University of Oulu	Finland	HM872024
Gelechiinae	Caryocolum blandelloides	MM17725	LEFIK150-10	University of Oulu	Finland	KJ427078
Gelechiinae	Caryocolum blandelloides	MM18243	LEFIK668-10	University of Oulu	Finland	JF854237
Gelechiinae	Caryocolum blandelloides	MM10499	LEFIF059-10	University of Oulu	Finland	HM874770
Gelechiinae	Caryocolum blandulella	MM19592	LEEUA184-11	University of Oulu	Denmark	KJ427095
Gelechiinae	Caryocolum blandulella	MM19286	LEFIL286-10	University of Oulu	Sweden	JN270954
Gelechiinae	Caryocolum cassella	MM12412	LEFIF586-10	University of Oulu	Finland	HM875270
Gelechiinae	Caryocolum cassella	MM08149	LEFIE046-10	University of Oulu	Finland	HM873794
Gelechiinae	Caryocolum cassella	MM09699	LEFIE707-10	University of Oulu	Finland	HM874428
Gelechiinae	Caryocolum cassella	MM09575	LEFIE633-10	University of Oulu	Finland	HM874356
Gelechiinae	Caryocolum cauligenella	MM17403	LEFIJ778-10	University of Oulu	Finland	JF853819
Gelechiinae	Caryocolum cauligenella	MM17401	LEFIJ776-10	University of Oulu	Finland	JF853817
Gelechiinae	Caryocolum cauligenella	MM17402	LEFIJ777-10	University of Oulu	Finland	JF853818
Gelechiinae	Caryocolum fischerella	MM13555	LEFIF971-10	University of Oulu	Finland	HM875652
Gelechiinae	Caryocolum fischerella	MM13556	LEFIF972-10	University of Oulu	Finland	HM875653
Gelechiinae	Caryocolum fraternella	MM12032	LEFIF480-10	University of Oulu	Finland	HM875165
Gelechiinae	Caryocolum fraternella	MM13552	LEFIF970-10	University of Oulu	Finland	HM875651
Gelechiinae	Caryocolum fraternella	MM05066	LEFIC851-10	University of Oulu	Finland	HM872669
Gelechiinae	Caryocolum junctella	MM05724	LEFIL705-10	University of Oulu	Finland	JF854695
Gelechiinae	Caryocolum kroesmanniella	MM09258	LEFIE482-10	University of Oulu	Finland	HM874206
Gelechiinae	Caryocolum kroesmanniella	MM11991	LEFIF466-10	University of Oulu	Finland	HM875151
Gelechiinae	Caryocolum kroesmanniella	MM12153	LEFIF521-10	University of Oulu	Finland	HM875206
Gelechiinae	Caryocolum petrophila	MM17972	LEFIK397-10	University of Oulu	Finland	JF854029
Gelechiinae	Caryocolum petrophila	MM09288	LEFIJ1014-11	University of Oulu	Finland	KJ427089
Gelechiinae	Caryocolum petrophila	MM17973	LEFIK398-10	University of Oulu	Finland	JF854030
Gelechiinae	Caryocolum petrophila	MM17577	LEFIK002-10	University of Oulu	Finland	JX034639
Gelechiinae	Caryocolum petryi	MM17400	LEFIJ775-10	University of Oulu	Finland	JF853816
Gelechiinae	Caryocolum petryi	MM17399	LEFIJ774-10	University of Oulu	Finland	JF853815
Gelechiinae	Caryocolum petryi	MM15648	LEFIG784-10	University of Oulu	Finland	HM876436
Gelechiinae	Caryocolum pullatella	MM09053	LEFIE429-10	University of Oulu	Finland	HM874153
Gelechiinae	Caryocolum pullatella	MM14646	LEFIG527-10	University of Oulu	Finland	HM876200
Gelechiinae	Caryocolum pullatella	MM00778	LEFIB286-10	University of Oulu	Finland	HM871187
Gelechiinae	Caryocolum pullatella	MM03085	LEFIB936-10	University of Oulu	Finland	HM871813
Gelechiinae	Caryocolum schleichi	MM17404	LEFIJ779-10	University of Oulu	Finland	JF853820
Gelechiinae	Caryocolum schleichi	MM18850	LEFIL552-10	University of Oulu	Sweden	JF854655
Gelechiinae	Caryocolum tischeriella	MM03743	LEFIC280-10	University of Oulu	Finland	HM872124
Gelechiinae	Caryocolum tricolorella	MM13550	LEFIF968-10	University of Oulu	Finland	HM875649
Gelechiinae	Caryocolum tricolorella	MM11992	LEFIF467-10	University of Oulu	Finland	HM875152
Gelechiinae	Caryocolum tricolorella	MM13551	LEFIF969-10	University of Oulu	Finland	HM875650
Gelechiinae	Caryocolum vicinella	MM13558	LEFIF974-10	University of Oulu	Finland	HM875655
Gelechiinae	Caryocolum vicinella	MM13559	LEFIF975-10	University of Oulu	Finland	HM875656
Gelechiinae	Caryocolum viscariella	MM11997	LEFIF469-10	University of Oulu	Finland	HM875154
Gelechiinae	Caryocolum viscariella	MM00777	LEFIB285-10	University of Oulu	Finland	KJ427085
Gelechiinae	Caryocolum viscariella	MM11998	LEFIF470-10	University of Oulu	Finland	HM875155
Gelechiinae	Chionodes continuella	MM11942	LEFIF453-10	University of Oulu	Finland	HM875138
Gelechiinae	Chionodes continuella	MM13396	LEFIF941-10	University of Oulu	Finland	HM875622
Gelechiinae	Chionodes continuella	MM08040	LEFID994-10	University of Oulu	Finland	HM873744
Gelechiinae	Chionodes continuella	MM03908	LEFIC378-10	University of Oulu	Finland	HM872221
Gelechiinae	Chionodes distinctella	MM10327	LEFIE939-10	University of Oulu	Finland	HM874656
Gelechiinae	Chionodes distinctella	MM14533	LEFIJ249-10	University of Oulu	Finland	JF853492
Gelechiinae	Chionodes distinctella	MM13548	LEFIJ234-10	University of Oulu	Finland	KM373634
Gelechiinae	Chionodes distinctella	MM06558	LEFID565-10	University of Oulu	Finland	HM873330
Gelechiinae	Chionodes distinctella	MM10028	LEFIJ146-10	University of Oulu	Finland	JF853459
Gelechiinae	Chionodes distinctella	MM09982	LEFIJ142-10	University of Oulu	Finland	KM373601
Gelechiinae	Chionodes distinctella	MM09981	LEFIE796-10	University of Oulu	Finland	HM874515
Gelechiinae	Chionodes electella	MM10148	LEFIE876-10	University of Oulu	Finland	HM874594
Gelechiinae	Chionodes electella	MM00691	LEFIB231-10	University of Oulu	Finland	HM871134
Gelechiinae	Chionodes electella	MM09791	LEFIA913-10	University of Oulu	Finland	HM387049
Gelechiinae	Chionodes fumatella	MM18606	LEFII179-10	University of Oulu	Finland	JF853388
Gelechiinae	Chionodes fumatella	MM18601	LEFII174-10	University of Oulu	Finland	JF853383
Gelechiinae	Chionodes fumatella	MM10326	LEFIE938-10	University of Oulu	Finland	HM874655
Gelechiinae	Chionodes fumatella	MM13545	LEFIF965-10	University of Oulu	Finland	HM875646
Gelechiinae	Chionodes fumatella	MM03589	LEFIJ057-10	University of Oulu	Finland	JF853419
Gelechiinae	Chionodes fumatella	MM13546	LEFIJ233-10	University of Oulu	Finland	KM373605
Gelechiinae	Chionodes fumatella	MM18607	LEFII180-10	University of Oulu	Finland	JF853389
Gelechiinae	Chionodes fumatella	MM13633	LEFIJ235-10	University of Oulu	Finland	KM373599
Gelechiinae	Chionodes fumatella	MM17578	LEFIK003-10	University of Oulu	Finland	JF853912
Gelechiinae	Chionodes fumatella	MM18600	LEFII173-10	University of Oulu	Finland	JF853382
Gelechiinae	Chionodes fumatella	MM17252	LEFIJ627-10	University of Oulu	Finland	JF853725
Gelechiinae	Chionodes fumatella	MM18653	LEFIL343-10	University of Oulu	Finland	JN270957
Gelechiinae	Chionodes fumatella	MM18605	LEFII178-10	University of Oulu	Finland	JF853387
Gelechiinae	Chionodes fumatella	MM18602	LEFII175-10	University of Oulu	Finland	JF853384
Gelechiinae	Chionodes fumatella	MM18604	LEFII177-10	University of Oulu	Finland	JF853386
Gelechiinae	Chionodes fumatella	MM14516	LEFIG472-10	University of Oulu	Finland	HM876148
Gelechiinae	Chionodes fumatella	MM18652	LEFIL342-10	University of Oulu	Finland	JN270956
Gelechiinae	Chionodes fumatella	MM18603	LEFII176-10	University of Oulu	Finland	JF853385
Gelechiinae	Chionodes fumatella	MM10282	LEFIJ155-10	University of Oulu	Finland	JF853468
Gelechiinae	Chionodes holosericella	MM08090	LEFIE025-10	University of Oulu	Finland	HM873774
Gelechiinae	Chionodes holosericella	MM10386	LEFIE969-10	University of Oulu	Finland	HM874686
Gelechiinae	Chionodes holosericella	MM02573	LEFIB739-10	University of Oulu	Finland	HM871617
Gelechiinae	Chionodes ignorantella	MM17331	LEFIJ706-10	University of Oulu	Finland	JF853782
Gelechiinae	Chionodes ignorantella	MM18240	LEFIK665-10	University of Oulu	Finland	JF854234
Gelechiinae	Chionodes ignorantella	MM17398	LEFIJ773-10	University of Oulu	Finland	JF853814
Gelechiinae	Chionodes ignorantella	MM17332	LEFIJ707-10	University of Oulu	Finland	JF853783
Gelechiinae	Chionodes luctuella	MM10155	LEFIE880-10	University of Oulu	Finland	HM874598
Gelechiinae	Chionodes luctuella	MM09778	LEFIA900-10	University of Oulu	Finland	HM387036
Gelechiinae	Chionodes luctuella	MM00693	LEFIB232-10	University of Oulu	Finland	HM871135
Gelechiinae	Chionodes lugubrella	MM13505	LEFIF947-10	University of Oulu	Finland	HM875628
Gelechiinae	Chionodes lugubrella	MM03257	LEFIC032-10	University of Oulu	Finland	HM871902
Gelechiinae	Chionodes nubilella	MM19853	LEEUA445-11	University of Oulu	Russia	JN270942
Gelechiinae	Chionodes nubilella	MM04150	LEFIA796-10	University of Oulu	Finland	HM386937
Gelechiinae	Chionodes nubilella	MM04129	LEFIA775-10	University of Oulu	Finland	HM386917
Gelechiinae	Chionodes nubilella	MM03088	LEFIB938-10	University of Oulu	Finland	HM871815
Gelechiinae	Chionodes nubilella	MM19850	LEEUA442-11	University of Oulu	Russia	JN270939
Gelechiinae	Chionodes tragicella	MM17397	LEFIJ772-10	University of Oulu	Finland	JF853813
Gelechiinae	Chionodes tragicella	MM15627	LEFIG763-10	University of Oulu	Finland	HM876416
Gelechiinae	Chionodes tragicella	MM10492	LEFIF052-10	University of Oulu	Finland	HM874763
Gelechiinae	Chionodes viduella	MM03439	LEFIJ056-10	University of Oulu	Finland	JX034603
Gelechiinae	Chionodes viduella	MM04153	LEFIA799-10	University of Oulu	Finland	HM386940
Gelechiinae	Chionodes viduella	MM06284	LEFID374-10	University of Oulu	Finland	HM873171
Gelechiinae	Chionodes viduella	MM00086	LEFIA015-10	University of Oulu	Finland	HM396365
Gelechiinae	Chionodes viduella	MM03893	LEFIC366-10	University of Oulu	Finland	HM872209
Gelechiinae	Chionodes violacea	MM18791	LEFIL493-10	University of Oulu	Finland	JF854621
Gelechiinae	Chionodes violacea	MM18231	LEFIK656-10	University of Oulu	Finland	JF854226
Gelechiinae	Chionodes violacea	MM09244	LEFIE471-10	University of Oulu	Finland	HM874195
Gelechiinae	Chionodes violacea	MM18675	LEFIL365-10	University of Oulu	Finland	KM373624
Gelechiinae	Chionodes violacea	MM10493	LEFIF053-10	University of Oulu	Finland	HM874764
Gelechiinae	Cosmardia moritzella	MM20661	LEEUA602-11	University of Oulu	Latvia	KM373611
Gelechiinae	Cosmardia moritzella	MM17726	LEFIK151-10	University of Oulu	Latvia	JN270953
Gelechiinae	Exoteleia dodecella	MM03918	LEFIC386-10	University of Oulu	Finland	HM872229
Gelechiinae	Exoteleia dodecella	MM09030	LEFIE422-10	University of Oulu	Finland	HM874146
Gelechiinae	Filatima incomptella	MM18232	LEFIK657-10	University of Oulu	Finland	JF854227
Gelechiinae	Filatima incomptella	MM14834	LEFIG618-10	University of Oulu	Finland	HM876284
Gelechiinae	Filatima incomptella	MM05466	LEFID029-10	University of Oulu	Finland	HM872843
Gelechiinae	Gelechia cuneatella	MM08017	LEFID985-10	University of Oulu	Finland	HM873735
Gelechiinae	Gelechia cuneatella	MM00956	LEFIA050-10	University of Oulu	Finland	HM396398
Gelechiinae	Gelechia cuneatella	MM14499	LEFIG458-10	University of Oulu	Finland	HM876134
Gelechiinae	Gelechia hippophaella	MM18230	LEFIK655-10	University of Oulu	Finland	JF854225
Gelechiinae	Gelechia hippophaella	MM15626	LEFIG762-10	University of Oulu	Finland	HM876415
Gelechiinae	Gelechia hippophaella	MM17396	LEFIJ771-10	University of Oulu	Finland	JF853812
Gelechiinae	Gelechia jakovlevi	MM02420	LEFIB653-10	University of Oulu	Finland	HM871532
Gelechiinae	Gelechia jakovlevi	MM02319	LEFIB603-10	University of Oulu	Finland	HM871482
Gelechiinae	Gelechia jakovlevi	MM02320	LEFIB604-10	University of Oulu	Finland	HM871483
Gelechiinae	Gelechia muscosella	MM03478	LEFIC135-10	University of Oulu	Finland	HM871981
Gelechiinae	Gelechia muscosella	MM09807	LEFIE717-10	University of Oulu	Finland	HM874437
Gelechiinae	Gelechia muscosella	MM06701	LEFID664-10	University of Oulu	Finland	HM873426
Gelechiinae	Gelechia muscosella	MM06540	LEFID551-10	University of Oulu	Finland	HM873316
Gelechiinae	Gelechia muscosella	MM06698	LEFID663-10	University of Oulu	Finland	HM873425
Gelechiinae	Gelechia muscosella	MM13875	LEFIA947-10	University of Oulu	Finland	HM387079
Gelechiinae	Gelechia nigra	MM05033	LEFIC835-10	University of Oulu	Finland	HM872653
Gelechiinae	Gelechia nigra	MM13501	LEFIF946-10	University of Oulu	Finland	HM875627
Gelechiinae	Gelechia nigra	MM12166	LEFIF526-10	University of Oulu	Finland	HM875211
Gelechiinae	Gelechia rhombella	MM02568	LEFIB736-10	University of Oulu	Finland	HM871614
Gelechiinae	Gelechia rhombella	MM03481	LEFIC137-10	University of Oulu	Finland	HM871983
Gelechiinae	Gelechia sabinellus	MM13511	LEFIF949-10	University of Oulu	Finland	HM875630
Gelechiinae	Gelechia sabinellus	MM21089	LEFIJ1229-11	University of Oulu	Finland	KM373626
Gelechiinae	Gelechia sabinellus	MM17575	LEFIJ950-10	University of Oulu	Finland	KM373604
Gelechiinae	Gelechia sabinellus	MM17576	LEFIK001-10	University of Oulu	Finland	KM373633
Gelechiinae	Gelechia sabinellus	MM06122	LEFID257-10	University of Oulu	Finland	HM873055
Gelechiinae	Gelechia sestertiella	MM18629	LEFIL319-10	University of Oulu	Finland	JN270955
Gelechiinae	Gelechia sestertiella	MM21059	LEFIJ1199-11	University of Oulu	Finland	KM373613
Gelechiinae	Gelechia sestertiella	MM14421	LEFIG398-10	University of Oulu	Finland	HM876075
Gelechiinae	Gelechia sororculella	MM00668	LEFIB214-10	University of Oulu	Finland	HM871118
Gelechiinae	Gelechia sororculella	MM13873	LEFIA945-10	University of Oulu	Finland	HM387078
Gelechiinae	Gelechia sororculella	MM00669	LEFIB215-10	University of Oulu	Finland	HM871119
Gelechiinae	Gelechia turpella	MM14796	LEFIG599-10	University of Oulu	Finland	HM876265
Gelechiinae	Gelechia turpella	MM17324	LEFIJ699-10	University of Oulu	Finland	JF853778
Gelechiinae	Gelechia turpella	MM14797	LEFIG600-10	University of Oulu	Finland	HM876266
Gelechiinae	Gnorimoschema epithymella	MM06043	LEFID213-10	University of Oulu	Finland	HM873015
Gelechiinae	Gnorimoschema epithymella	MM10325	LEFIE937-10	University of Oulu	Finland	HM874654
Gelechiinae	Gnorimoschema herbichii	MM10494	LEFIF054-10	University of Oulu	Finland	HM874765
Gelechiinae	Gnorimoschema herbichii	MM15628	LEFIG764-10	University of Oulu	Finland	HM876417
Gelechiinae	Gnorimoschema herbichii	MM18234	LEFIK659-10	University of Oulu	Finland	JF854229
Gelechiinae	Gnorimoschema nordlandicolella	MM06240	LEFID344-10	University of Oulu	Finland	HM873141
Gelechiinae	Gnorimoschema nordlandicolella	MM10420	LEFIE983-10	University of Oulu	Finland	HM874699
Gelechiinae	Gnorimoschema nordlandicolella	MM10023	LEFIE820-10	University of Oulu	Finland	HM874539
Gelechiinae	Gnorimoschema streliciella	MM15632	LEFIG768-10	University of Oulu	Finland	HQ570410
Gelechiinae	Gnorimoschema streliciella	MM15631	LEFIG767-10	University of Oulu	Finland	HM876420
Gelechiinae	Gnorimoschema valesiella	MM15630	LEFIG766-10	University of Oulu	Finland	HM876419
Gelechiinae	Gnorimoschema valesiella	MM14150	LEFIG237-10	University of Oulu	Finland	HM875916
Gelechiinae	Gnorimoschema valesiella	MM06377	LEFID444-10	University of Oulu	Finland	HQ570340
Gelechiinae	Klimeschiopsis kiningerella	MM13567	LEFIF980-10	University of Oulu	Finland	HM875661
Gelechiinae	Klimeschiopsis kiningerella	MM13568	LEFIF981-10	University of Oulu	Finland	HM875662
Gelechiinae	Neofriseria peliella	MM05055	LEFIC843-10	University of Oulu	Finland	HM872661
Gelechiinae	Neofriseria peliella	MM18236	LEFIK661-10	University of Oulu	Finland	JF854231
Gelechiinae	Neofriseria peliella	MM18828	LEFIL530-10	University of Oulu	Finland	JF854642
Gelechiinae	Neofriseria peliella	MM18239	LEFIK664-10	University of Oulu	Finland	JF854233
Gelechiinae	Neofriseria peliella	MM11996	LEFIF468-10	University of Oulu	Finland	HM875153
Gelechiinae	Neofriseria peliella	MM18238	LEFIK663-10	University of Oulu	Finland	JF854232
Gelechiinae	Neofriseria peliella	MM13619	LEFIG006-10	University of Oulu	Finland	HM875686
Gelechiinae	Neofriseria peliella	MM13544	LEFIF964-10	University of Oulu	Finland	HM875645
Gelechiinae	Neofriseria peliella	MM18237	LEFIK662-10	University of Oulu	Finland	KM373623
Gelechiinae	Neofriseria peliella	MM13547	LEFIF966-10	University of Oulu	Finland	HM875647
Gelechiinae	Neofriseria peliella	MM19876	LEEUA468-11	University of Oulu	Finland	JN270943
Gelechiinae	Neofriseria peliella	MM13614	LEFIG003-10	University of Oulu	Finland	HM875683
Gelechiinae	Neofriseria singula	MM17719	LEFIK144-10	University of Oulu	Denmark	JN270951
Gelechiinae	Neofriseria singula	MM17720	LEFIK145-10	University of Oulu	Denmark	JN270952
Gelechiinae	Neotelphusa sequax	MM19898	LEFII248-11	Research Collection of E. Laasonen	Finland	KM373609
Gelechiinae	Neotelphusa sequax	MM17712	LEFIK137-10	University of Oulu	Finland	JN270947
Gelechiinae	Neotelphusa sequax	MM19899	LEFII249-11	Research Collection of E. Laasonen	Finland	KM373618
Gelechiinae	Neotelphusa sequax	MM17713	LEFIK138-10	University of Oulu	Finland	JN270948
Gelechiinae	Parachronistis albiceps	MM09445	LEFIE559-10	University of Oulu	Finland	HM874282
Gelechiinae	Parachronistis albiceps	MM06038	LEFID209-10	University of Oulu	Finland	HM873011
Gelechiinae	Parachronistis albiceps	MM06876	LEFID800-10	University of Oulu	Finland	HM873557
Gelechiinae	Parachronistis albiceps	MM09735	LEFIA858-10	University of Oulu	Finland	HM386996
Gelechiinae	Parachronistis albiceps	MM09224	LEFIE458-10	University of Oulu	Finland	HM874182
Gelechiinae	Parachronistis albiceps	MM06737	LEFID690-10	University of Oulu	Finland	HM873451
Gelechiinae	Prolita sexpunctella	MM06425	LEFID482-10	University of Oulu	Finland	HM873248
Gelechiinae	Prolita sexpunctella	MM03220	LEFIC014-10	University of Oulu	Finland	HM871884
Gelechiinae	Prolita sexpunctella	MM18233	LEFIK658-10	University of Oulu	Finland	JF854228
Gelechiinae	Pseudotelphusa paripunctella	MM05441	LEFID016-10	University of Oulu	Finland	HM872830
Gelechiinae	Pseudotelphusa paripunctella	MM03898	LEFIC370-10	University of Oulu	Finland	HM872213
Gelechiinae	Pseudotelphusa paripunctella	MM00529	LEFIB146-10	University of Oulu	Finland	HM871051
Gelechiinae	Pseudotelphusa paripunctella	MM19716	LEEUA308-11	University of Oulu	Denmark	JN270929
Gelechiinae	Pseudotelphusa paripunctella	MM05473	LEFID031-10	University of Oulu	Finland	HM872845
Gelechiinae	Pseudotelphusa scalella	MM19231	LEFIL231-10	University of Oulu	Estonia	JF854542
Gelechiinae	Pseudotelphusa scalella	MM18975	LEFIL677-10	University of Oulu	Russia	KM373631
Gelechiinae	Pseudotelphusa scalella	MM19232	LEFIL232-10	University of Oulu	Estonia	JF854543
Gelechiinae	Psoricoptera gibbosella	MM05057	LEFIC845-10	University of Oulu	Finland	HM872663
Gelechiinae	Psoricoptera gibbosella	MM05058	LEFIC846-10	University of Oulu	Finland	HM872664
Gelechiinae	Psoricoptera gibbosella	MM05059	LEFIC847-10	University of Oulu	Finland	HM872665
Gelechiinae	Psoricoptera speciosella	MM02225	LEFIB571-10	University of Oulu	Finland	HM871453
Gelechiinae	Psoricoptera speciosella	MM03072	LEFIB931-10	University of Oulu	Finland	HM871808
Gelechiinae	Psoricoptera speciosella	MM02226	LEFIB572-10	University of Oulu	Finland	HM871454
Gelechiinae	Psoricoptera speciosella	MM08984	LEFIE410-10	University of Oulu	Finland	HM874134
Gelechiinae	Psoricoptera speciosella	MM08983	LEFIE409-10	University of Oulu	Finland	HM874133
Gelechiinae	Psoricoptera speciosella	MM08985	LEFIE411-10	University of Oulu	Finland	HM874135
Gelechiinae	Recurvaria leucatella	MM02317	LEFIB602-10	University of Oulu	Finland	HM871481
Gelechiinae	Recurvaria leucatella	MM05493	LEFID039-10	University of Oulu	Finland	HM872853
Gelechiinae	Scrobipalpa acuminatella	MM17275	LEFIJ650-10	University of Oulu	Finland	JF853745
Gelechiinae	Scrobipalpa acuminatella	MM02537	LEFIB720-10	University of Oulu	Finland	HM871598
Gelechiinae	Scrobipalpa acuminatella	MM14050	LEFIG182-10	University of Oulu	Finland	HM875862
Gelechiinae	Scrobipalpa acuminatella	MM03835	LEFIC330-10	University of Oulu	Finland	HM872174
Gelechiinae	Scrobipalpa artemisiella	MM18241	LEFIK666-10	University of Oulu	Finland	JF854235
Gelechiinae	Scrobipalpa artemisiella	MM15637	LEFIG773-10	University of Oulu	Finland	HM876425
Gelechiinae	Scrobipalpa artemisiella	MM15638	LEFIG774-10	University of Oulu	Finland	HM876426
Gelechiinae	Scrobipalpa atriplicella	MM13622	LEFIG009-10	University of Oulu	Finland	HM875689
Gelechiinae	Scrobipalpa atriplicella	MM09527	LEFIE612-10	University of Oulu	Finland	HM874335
Gelechiinae	Scrobipalpa atriplicella	MM17311	LEFIJ686-10	University of Oulu	Finland	JF853772
Gelechiinae	Scrobipalpa atriplicella	MM02577	LEFIB740-10	University of Oulu	Finland	HM871618
Gelechiinae	Scrobipalpa bryophiloides	MM19211	LEFIL211-10	University of Oulu	Russia	JF854533
Gelechiinae	Scrobipalpa bryophiloides	MM19212	LEFIL212-10	University of Oulu	Russia	JF854534
Gelechiinae	Scrobipalpa murinella	MM15634	LEFIG770-10	University of Oulu	Finland	HM876422
Gelechiinae	Scrobipalpa murinella	MM15633	LEFIG769-10	University of Oulu	Finland	HM876421
Gelechiinae	Scrobipalpa murinella	MM17937	LEFIK362-10	University of Oulu	Finland	JF853997
Gelechiinae	Scrobipalpa nitentella	MM18242	LEFIK667-10	University of Oulu	Finland	JF854236
Gelechiinae	Scrobipalpa nitentella	MM15643	LEFIG779-10	University of Oulu	Finland	HM876431
Gelechiinae	Scrobipalpa nitentella	MM15644	LEFIG780-10	University of Oulu	Finland	HM876432
Gelechiinae	Scrobipalpa obsoletella	MM15642	LEFIG778-10	University of Oulu	Finland	HM876430
Gelechiinae	Scrobipalpa obsoletella	MM17297	LEFIJ672-10	University of Oulu	Finland	JF853760
Gelechiinae	Scrobipalpa pauperella	MM15636	LEFIG772-10	University of Oulu	Finland	HM876424
Gelechiinae	Scrobipalpa pauperella	MM15635	LEFIG771-10	University of Oulu	Finland	HM876423
Gelechiinae	Scrobipalpa pauperella	MM00637	LEFIB197-10	University of Oulu	Finland	HM871101
Gelechiinae	Scrobipalpa pauperella	MM20660	LEEUA601-11	University of Oulu	Latvia	KM373622
Gelechiinae	Scrobipalpa proclivella	MM19900	LEFII250-11	Research Collection of E. Laasonen	Finland	KM373630
Gelechiinae	Scrobipalpa salicorniae	MM10497	LEFIF057-10	University of Oulu	Finland	HM874768
Gelechiinae	Scrobipalpa salicorniae	MM17724	LEFIK149-10	University of Oulu	Finland	KM373608
Gelechiinae	Scrobipalpa salicorniae	MM10498	LEFIF058-10	University of Oulu	Finland	HM874769
Gelechiinae	Scrobipalpa samadensis	MM12059	LEFIF493-10	University of Oulu	Finland	HM875178
Gelechiinae	Scrobipalpa samadensis	MM17280	LEFIJ655-10	University of Oulu	Finland	JF853750
Gelechiinae	Scrobipalpa samadensis	MM10496	LEFIF056-10	University of Oulu	Finland	HM874767
Gelechiinae	Scrobipalpa samadensis	MM14259	LEFIG301-10	University of Oulu	Finland	HM875980
Gelechiinae	Scrobipalpa samadensis	MM09525	LEFIE611-10	University of Oulu	Finland	HM874334
Gelechiinae	Scrobipalpa samadensis	MM13613	LEFIG002-10	University of Oulu	Finland	HM875682
Gelechiinae	Scrobipalpa samadensis	MM03542	LEFIC185-10	University of Oulu	Finland	HM872029
Gelechiinae	Scrobipalpa stangei	MM15639	LEFIG775-10	University of Oulu	Finland	HM876427
Gelechiinae	Scrobipalpa stangei	MM15640	LEFIG776-10	University of Oulu	Finland	HM876428
Gelechiinae	Scrobipalpopsis petasitis	MM18235	LEFIK660-10	University of Oulu	Finland	JF854230
Gelechiinae	Scrobipalpopsis petasitis	MM11172	LEFIF351-10	University of Oulu	Finland	HM875036
Gelechiinae	Scrobipalpopsis petasitis	MM10495	LEFIF055-10	University of Oulu	Finland	HM874766
Gelechiinae	Scrobipalpula diffluella	MM21197	LEFIJ957-11	University of Oulu	Finland	KM373591
Gelechiinae	Scrobipalpula psilella	MM15645	LEFIG781-10	University of Oulu	Finland	HM876433
Gelechiinae	Scrobipalpula psilella	MM00341	LEFIB057-10	University of Oulu	Finland	HM870966
Gelechiinae	Scrobipalpula psilella	MM13634	LEFIG013-10	University of Oulu	Finland	HM875693
Gelechiinae	Stenolechia gemmella	MM13604	LEFIF997-10	University of Oulu	Finland	HM875678
Gelechiinae	Stenolechia gemmella	MM03460	LEFIC123-10	University of Oulu	Finland	HM871970
Gelechiinae	Teleiodes flavimaculella	MM10491	LEFIF051-10	University of Oulu	Finland	HM874762
Gelechiinae	Teleiodes flavimaculella	MM09223	LEFIE457-10	University of Oulu	Finland	HM874181
Gelechiinae	Teleiodes flavimaculella	MM17574	LEFIJ949-10	University of Oulu	Finland	KM373632
Gelechiinae	Teleiodes luculella	MM18229	LEFIK654-10	University of Oulu	Finland	JF854224
Gelechiinae	Teleiodes luculella	MM09775	LEFIA898-10	University of Oulu	Finland	HM387034
Gelechiinae	Teleiodes luculella	MM09792	LEFIA914-10	University of Oulu	Finland	HM387050
Gelechiinae	Teleiodes wagae	MM17710	LEFIK135-10	University of Oulu	Finland	JN270945
Gelechiinae	Teleiodes vulgella	MM12470	LEFIF599-10	University of Oulu	Finland	HM875283
Gelechiinae	Teleiodes vulgella	MM10490	LEFIF050-10	University of Oulu	Finland	HM874761
Gelechiinae	Teleiodes vulgella	MM13610	LEFIG001-10	University of Oulu	Finland	HM875681
Gelechiinae	Teleiopsis diffinis	MM13399	LEFIF943-10	University of Oulu	Finland	HM875624
Gelechiinae	Teleiopsis diffinis	MM06557	LEFID564-10	University of Oulu	Finland	HM873329
Elachistinae	Elachista aepsera	gvc14581-1L	LOQTE955-10	Research Collection of Graeme V. Cocks	Australia	JF857079
Elachistinae	Elachista aepsera	10ANIC-04727	ANICH730-10	Australian National Insect Collection	Australia	HQ948495
Elachistinae	Elachista aepsera	MM16908	ELACA1145-11	Finnish Museum of Natural History	Australia	KM373621
Elachistinae	Elachista alacera	MM16925	ELACA1162-11	Finnish Museum of Natural History	Australia	KM373597
Elachistinae	Elachista aluta	10ANIC-04536	ANICH539-10	Australian National Insect Collection	Australia	HQ948358
Elachistinae	Elachista anolba	MM16919	ELACA1156-11	Finnish Museum of Natural History	Australia	KM373600
Elachistinae	Elachista aposematica	10ANIC-04521	ANICH524-10	Australian National Insect Collection	Australia	HQ948350
Elachistinae	Elachista asperae	10ANIC-04770	ANICH773-10	Australian National Insect Collection	Australia	HQ948536
Elachistinae	Elachista asperae	10ANIC-04769	ANICH772-10	Australian National Insect Collection	Australia	HQ948535
Elachistinae	Elachista averta	10ANIC-04498	ANICH501-10	Australian National Insect Collection	Australia	HQ948332
Elachistinae	Elachista averta	10ANIC-04967	ANICH970-10	Australian National Insect Collection	Australia	HQ948664
Elachistinae	Elachista bidens	10ANIC-04698	ANICH701-10	Australian National Insect Collection	Australia	HQ948469
Elachistinae	Elachista campsella	10ANIC-04817	ANICH820-10	Australian National Insect Collection	Australia	HQ948575
Elachistinae	Elachista carcharota	10ANIC-04489	ANICH492-10	Australian National Insect Collection	Australia	HQ948323
Elachistinae	Elachista carcharota	10ANIC-04490	ANICH493-10	Australian National Insect Collection	Australia	HQ948324
Elachistinae	Elachista carcharota	MM16923	ELACA1160-11	Finnish Museum of Natural History	Australia	KM373598
Elachistinae	Elachista catagma	10ANIC-04708	ANICH711-10	Australian National Insect Collection	Australia	HQ948479
Elachistinae	Elachista catagma	10ANIC-04709	ANICH712-10	Australian National Insect Collection	Australia	HQ948480
Elachistinae	Elachista catarata	10ANIC-04502	ANICH505-10	Australian National Insect Collection	Australia	HQ948336
Elachistinae	Elachista catarata	10ANIC-04505	ANICH508-10	Australian National Insect Collection	Australia	HQ948339
Elachistinae	Elachista catarata	10ANIC-04503	ANICH506-10	Australian National Insect Collection	Australia	HQ948337
Elachistinae	Elachista catarata	10ANIC-04504	ANICH507-10	Australian National Insect Collection	Australia	HQ948338
Elachistinae	Elachista cerebrosella	10ANIC-04830	ANICH833-10	Australian National Insect Collection	Australia	HQ948587
Elachistinae	Elachista cerebrosella	10ANIC-04559	ANICH562-10	Australian National Insect Collection	Australia	HQ948370
Elachistinae	Elachista chilotera	10ANIC-04825	ANICH828-10	Australian National Insect Collection	Australia	HQ948582
Elachistinae	Elachista coalita	10ANIC-04517	ANICH520-10	Australian National Insect Collection	Australia	HQ948346
Elachistinae	Elachista coalita	10ANIC-04520	ANICH523-10	Australian National Insect Collection	Australia	HQ948349
Elachistinae	Elachista coalita	10ANIC-04518	ANICH521-10	Australian National Insect Collection	Australia	HQ948347
Elachistinae	Elachista coalita	10ANIC-04519	ANICH522-10	Australian National Insect Collection	Australia	HQ948348
Elachistinae	Elachista corbicula	10ANIC-04526	ANICH529-10	Australian National Insect Collection	Australia	HQ948353
Elachistinae	Elachista crenatella	10ANIC-04697	ANICH700-10	Australian National Insect Collection	Australia	HQ948468
Elachistinae	Elachista crenatella	MM16922	ELACA1159-11	Finnish Museum of Natural History	Australia	KM373615
Elachistinae	Elachista crenatella	10ANIC-04696	ANICH699-10	Australian National Insect Collection	Australia	HQ948467
Elachistinae	Elachista crocospila	10ANIC-04777	ANICH780-10	Australian National Insect Collection	Australia	HQ948541
Elachistinae	Elachista crocospila	10ANIC-04775	ANICH778-10	Australian National Insect Collection	Australia	JF840433
Elachistinae	Elachista crocospila	10ANIC-04776	ANICH779-10	Australian National Insect Collection	Australia	HQ948540
Elachistinae	Elachista crumilla	10ANIC-04678	ANICH681-10	Australian National Insect Collection	Australia	HQ948450
Elachistinae	Elachista crumilla	10ANIC-04677	ANICH680-10	Australian National Insect Collection	Australia	HQ948449
Elachistinae	Elachista crumilla	10ANIC-04679	ANICH682-10	Australian National Insect Collection	Australia	HQ948451
Elachistinae	Elachista cyanea	10ANIC-04960	ANICH963-10	Australian National Insect Collection	Australia	HQ948660
Elachistinae	Elachista cyanea	10ANIC-04959	ANICH962-10	Australian National Insect Collection	Australia	HQ948659
Elachistinae	Elachista cycotis	10ANIC-04711	ANICH714-10	Australian National Insect Collection	Australia	HQ948481
Elachistinae	Elachista cycotis	10ANIC-04833	ANICH836-10	Australian National Insect Collection	Australia	HQ948589
Elachistinae	Elachista cycotis	10ANIC-04713	ANICH716-10	Australian National Insect Collection	Australia	HQ948483
Elachistinae	Elachista cycotis	10ANIC-04712	ANICH715-10	Australian National Insect Collection	Australia	HQ948482
Elachistinae	Elachista cylistica	10ANIC-04707	ANICH710-10	Australian National Insect Collection	Australia	HQ948478
Elachistinae	Elachista cynopa	10ANIC-04714	ANICH717-10	Australian National Insect Collection	Australia	HQ948484
Elachistinae	Elachista cynopa	10ANIC-04715	ANICH718-10	Australian National Insect Collection	Australia	HQ948485
Elachistinae	Elachista cynopa	10ANIC-04717	ANICH720-10	Australian National Insect Collection	Australia	HQ948486
Elachistinae	Elachista delira	10ANIC-04658	ANICH661-10	Australian National Insect Collection	Australia	HQ948431
Elachistinae	Elachista delira	10ANIC-04657	ANICH660-10	Australian National Insect Collection	Australia	HQ948430
Elachistinae	Elachista delira	10ANIC-04656	ANICH659-10	Australian National Insect Collection	Australia	HQ948429
Elachistinae	Elachista deusta	10ANIC-04484	ANICH487-10	Australian National Insect Collection	Australia	HQ948318
Elachistinae	Elachista deusta	10ANIC-04483	ANICH486-10	Australian National Insect Collection	Australia	HQ948317
Elachistinae	Elachista deusta	10ANIC-04485	ANICH488-10	Australian National Insect Collection	Australia	HQ948319
Elachistinae	Elachista dieropa	10ANIC-04550	ANICH553-10	Australian National Insect Collection	Australia	HQ948364
Elachistinae	Elachista dieropa	10ANIC-04548	ANICH551-10	Australian National Insect Collection	Australia	HQ948362
Elachistinae	Elachista dieropa	10ANIC-04549	ANICH552-10	Australian National Insect Collection	Australia	HQ948363
Elachistinae	Elachista diligens	10ANIC-04733	ANICH736-10	Australian National Insect Collection	Australia	HQ948501
Elachistinae	Elachista diligens	10ANIC-04731	ANICH734-10	Australian National Insect Collection	Australia	HQ948499
Elachistinae	Elachista diligens	10ANIC-04732	ANICH735-10	Australian National Insect Collection	Australia	HQ948500
Elachistinae	Elachista diligens	10ANIC-04734	ANICH737-10	Australian National Insect Collection	Australia	HQ948502
Elachistinae	Elachista discina	10ANIC-04499	ANICH502-10	Australian National Insect Collection	Australia	HQ948333
Elachistinae	Elachista discina	10ANIC-04501	ANICH504-10	Australian National Insect Collection	Australia	HQ948335
Elachistinae	Elachista discina	10ANIC-04750	ANICH753-10	Australian National Insect Collection	Australia	HQ948518
Elachistinae	Elachista discina	10ANIC-04500	ANICH503-10	Australian National Insect Collection	Australia	HQ948334
Elachistinae	Elachista discina	10ANIC-04749	ANICH752-10	Australian National Insect Collection	Australia	HQ948517
Elachistinae	Elachista discina	10ANIC-04748	ANICH751-10	Australian National Insect Collection	Australia	HQ948516
Elachistinae	Elachista effusi	10ANIC-04478	ANICH481-10	Australian National Insect Collection	Australia	HQ948312
Elachistinae	Elachista effusi	10ANIC-04480	ANICH483-10	Australian National Insect Collection	Australia	HQ948314
Elachistinae	Elachista effusi	10ANIC-04477	ANICH480-10	Australian National Insect Collection	Australia	HQ948311
Elachistinae	Elachista effusi	10ANIC-04479	ANICH482-10	Australian National Insect Collection	Australia	HQ948313
Elachistinae	Elachista elaphria	10ANIC-04552	ANICH555-10	Australian National Insect Collection	Australia	HQ948366
Elachistinae	Elachista elaphria	10ANIC-04551	ANICH554-10	Australian National Insect Collection	Australia	HQ948365
Elachistinae	Elachista epartica	10ANIC-04941	ANICH944-10	Australian National Insect Collection	Australia	HQ948644
Elachistinae	Elachista eriodes	10ANIC-04669	ANICH672-10	Australian National Insect Collection	Australia	HQ948441
Elachistinae	Elachista eriodes	10ANIC-04670	ANICH673-10	Australian National Insect Collection	Australia	HQ948442
Elachistinae	Elachista etorella	10ANIC-04660	ANICH663-10	Australian National Insect Collection	Australia	HQ948433
Elachistinae	Elachista etorella	MM16937	ELACA1174-11	Finnish Museum of Natural History	Australia	KM373612
Elachistinae	Elachista etorella	MM16934	ELACA1171-11	Finnish Museum of Natural History	Australia	KM373619
Elachistinae	Elachista etorella	10ANIC-04661	ANICH664-10	Australian National Insect Collection	Australia	HQ948434
Elachistinae	Elachista etorella	10ANIC-04659	ANICH662-10	Australian National Insect Collection	Australia	HQ948432
Elachistinae	Elachista etorella	10ANIC-04662	ANICH665-10	Australian National Insect Collection	Australia	HQ948435
Elachistinae	Elachista etorella	10ANIC-04702	ANICH705-10	Australian National Insect Collection	Australia	HQ948473
Elachistinae	Elachista etorella	MM16933	ELACA1170-11	Finnish Museum of Natural History	Australia	KM373617
Elachistinae	Elachista etorella	MM16935	ELACA1172-11	Finnish Museum of Natural History	Australia	KM373610
Elachistinae	Elachista etorella	MM16936	ELACA1173-11	Finnish Museum of Natural History	Australia	KM373616
Elachistinae	Elachista etorella	MM16931	ELACA1168-11	Finnish Museum of Natural History	Australia	KM373607
Elachistinae	Elachista etorella	MM16932	ELACA1169-11	Finnish Museum of Natural History	Australia	KM373596
Elachistinae	Elachista etorella	10ANIC-04704	ANICH707-10	Australian National Insect Collection	Australia	HQ948475
Elachistinae	Elachista etorella	10ANIC-04703	ANICH706-10	Australian National Insect Collection	Australia	HQ948474
Elachistinae	Elachista euthema	10ANIC-04535	ANICH538-10	Australian National Insect Collection	Australia	HQ948357
Elachistinae	Elachista evexa	10ANIC-04822	ANICH825-10	Australian National Insect Collection	Australia	HQ948580
Elachistinae	Elachista evexa	10ANIC-04823	ANICH826-10	Australian National Insect Collection	Australia	HQ948581
Elachistinae	Elachista faberella	10ANIC-04706	ANICH709-10	Australian National Insect Collection	Australia	HQ948477
Elachistinae	Elachista faberella	10ANIC-04705	ANICH708-10	Australian National Insect Collection	Australia	HQ948476
Elachistinae	Elachista filiphila	10ANIC-04516	ANICH519-10	Australian National Insect Collection	Australia	HQ948345
Elachistinae	Elachista filiphila	MM16921	ELACA1158-11	Finnish Museum of Natural History	Australia	KM373636
Elachistinae	Elachista flammula	10ANIC-04826	ANICH829-10	Australian National Insect Collection	Australia	HQ948583
Elachistinae	Elachista flammula	10ANIC-04828	ANICH831-10	Australian National Insect Collection	Australia	HQ948585
Elachistinae	Elachista flammula	10ANIC-04827	ANICH830-10	Australian National Insect Collection	Australia	HQ948584
Elachistinae	Elachista flavicilia	10ANIC-04744	ANICH747-10	Australian National Insect Collection	Australia	HQ948512
Elachistinae	Elachista flavicilia	10ANIC-04746	ANICH749-10	Australian National Insect Collection	Australia	HQ948514
Elachistinae	Elachista flavicilia	10ANIC-04745	ANICH748-10	Australian National Insect Collection	Australia	HQ948513
Elachistinae	Elachista flavicilia	10ANIC-04747	ANICH750-10	Australian National Insect Collection	Australia	HQ948515
Elachistinae	Elachista floccella	10ANIC-04683	ANICH686-10	Australian National Insect Collection	Australia	HQ948455
Elachistinae	Elachista floccella	10ANIC-04493	ANICH496-10	Australian National Insect Collection	Australia	HQ948327
Elachistinae	Elachista floccella	10ANIC-04492	ANICH495-10	Australian National Insect Collection	Australia	HQ948326
Elachistinae	Elachista floccella	10ANIC-04491	ANICH494-10	Australian National Insect Collection	Australia	HQ948325
Elachistinae	Elachista fucosa	10ANIC-04843	ANICH846-10	Australian National Insect Collection	Australia	HQ948594
Elachistinae	Elachista gemadella	MM16907	ELACA1144-11	Finnish Museum of Natural History	Australia	KM373603
Elachistinae	Elachista gerasmia	10ANIC-04675	ANICH678-10	Australian National Insect Collection	Australia	HQ948447
Elachistinae	Elachista gerasmia	10ANIC-04676	ANICH679-10	Australian National Insect Collection	Australia	HQ948448
Elachistinae	Elachista gerasmia	10ANIC-04674	ANICH677-10	Australian National Insect Collection	Australia	HQ948446
Elachistinae	Elachista gerasmia	10ANIC-04672	ANICH675-10	Australian National Insect Collection	Australia	HQ948444
Elachistinae	Elachista gladiatrix	10ANIC-04487	ANICH490-10	Australian National Insect Collection	Australia	HQ948321
Elachistinae	Elachista gladiatrix	10ANIC-04488	ANICH491-10	Australian National Insect Collection	Australia	HQ948322
Elachistinae	Elachista gladiograpta	10ANIC-04467	ANICH470-10	Australian National Insect Collection	Australia	HQ948304
Elachistinae	Elachista gladiograpta	10ANIC-04468	ANICH471-10	Australian National Insect Collection	Australia	HQ948305
Elachistinae	Elachista gladiograpta	10ANIC-04466	ANICH469-10	Australian National Insect Collection	Australia	HQ948303
Elachistinae	Elachista glomerella	10ANIC-04943	ANICH946-10	Australian National Insect Collection	Australia	HQ948645
Elachistinae	Elachista habrella	10ANIC-04782	ANICH785-10	Australian National Insect Collection	Australia	HQ948545
Elachistinae	Elachista ictera	10ANIC-04771	ANICH774-10	Australian National Insect Collection	Australia	HQ948537
Elachistinae	Elachista ignicolor	10ANIC-04945	ANICH948-10	Australian National Insect Collection	Australia	HQ948647
Elachistinae	Elachista ignicolor	10ANIC-04944	ANICH947-10	Australian National Insect Collection	Australia	HQ948646
Elachistinae	Elachista illota	10ANIC-04753	ANICH756-10	Australian National Insect Collection	Australia	HQ948521
Elachistinae	Elachista illota	10ANIC-04752	ANICH755-10	Australian National Insect Collection	Australia	HQ948520
Elachistinae	Elachista illota	10ANIC-04970	ANICH973-10	Australian National Insect Collection	Australia	HQ948667
Elachistinae	Elachista illota	10ANIC-04751	ANICH754-10	Australian National Insect Collection	Australia	HQ948519
Elachistinae	Elachista lachnella	10ANIC-04495	ANICH498-10	Australian National Insect Collection	Australia	HQ948329
Elachistinae	Elachista lachnella	MM16905	ELACA1142-11	Finnish Museum of Natural History	Australia	KM373635
Elachistinae	Elachista lachnella	10ANIC-04494	ANICH497-10	Australian National Insect Collection	Australia	HQ948328
Elachistinae	Elachista levipes	10ANIC-04956	ANICH959-10	Australian National Insect Collection	Australia	HQ948656
Elachistinae	Elachista levipes	10ANIC-04964	ANICH967-10	Australian National Insect Collection	Australia	HQ948663
Elachistinae	Elachista levipes	10ANIC-04954	ANICH957-10	Australian National Insect Collection	Australia	HQ948654
Elachistinae	Elachista ligula	10ANIC-04510	ANICH513-10	Australian National Insect Collection	Australia	HQ948340
Elachistinae	Elachista litharga	MM16911	ELACA1148-11	Finnish Museum of Natural History	Australia	KM373602
Elachistinae	Elachista litharga	MM16913	ELACA1150-11	Finnish Museum of Natural History	Australia	KM373625
Elachistinae	Elachista litharga	MM16912	ELACA1149-11	Finnish Museum of Natural History	Australia	KM373595
Elachistinae	Elachista magidina	10ANIC-04681	ANICH684-10	Australian National Insect Collection	Australia	HQ948453
Elachistinae	Elachista magidina	10ANIC-04682	ANICH685-10	Australian National Insect Collection	Australia	HQ948454
Elachistinae	Elachista magidina	10ANIC-04684	ANICH687-10	Australian National Insect Collection	Australia	HQ948456
Elachistinae	Elachista magidina	10ANIC-04680	ANICH683-10	Australian National Insect Collection	Australia	HQ948452
Elachistinae	Elachista melanthes	10ANIC-04969	ANICH972-10	Australian National Insect Collection	Australia	HQ948666
Elachistinae	Elachista melanthes	MM16916	ELACA1153-11	Finnish Museum of Natural History	Australia	KM373593
Elachistinae	Elachista melanthes	10ANIC-04757	ANICH760-10	Australian National Insect Collection	Australia	HQ948524
Elachistinae	Elachista menura	10ANIC-04820	ANICH823-10	Australian National Insect Collection	Australia	HQ948578
Elachistinae	Elachista menura	10ANIC-04819	ANICH822-10	Australian National Insect Collection	Australia	HQ948577
Elachistinae	Elachista menura	10ANIC-04818	ANICH821-10	Australian National Insect Collection	Australia	HQ948576
Elachistinae	Elachista menura	10ANIC-04821	ANICH824-10	Australian National Insect Collection	Australia	HQ948579
Elachistinae	Elachista merista	10ANIC-04515	ANICH518-10	Australian National Insect Collection	Australia	HQ948344
Elachistinae	Elachista merista	MM16920	ELACA1157-11	Finnish Museum of Natural History	Australia	KM373590
Elachistinae	Elachista micalis	10ANIC-04783	ANICH786-10	Australian National Insect Collection	Australia	HQ948546
Elachistinae	Elachista mundula	10ANIC-04700	ANICH703-10	Australian National Insect Collection	Australia	HQ948471
Elachistinae	Elachista mundula	10ANIC-04952	ANICH955-10	Australian National Insect Collection	Australia	HQ948653
Elachistinae	Elachista mundula	10ANIC-04699	ANICH702-10	Australian National Insect Collection	Australia	HQ948470
Elachistinae	Elachista mundula	10ANIC-04701	ANICH704-10	Australian National Insect Collection	Australia	HQ948472
Elachistinae	Elachista mutarata	10ANIC-04766	ANICH769-10	Australian National Insect Collection	Australia	HQ948532
Elachistinae	Elachista mutarata	10ANIC-04767	ANICH770-10	Australian National Insect Collection	Australia	HQ948533
Elachistinae	Elachista mutarata	10ANIC-04765	ANICH768-10	Australian National Insect Collection	Australia	HQ948531
Elachistinae	Elachista nielsencommelinae	10ANIC-04949	ANICH952-10	Australian National Insect Collection	Australia	HQ948650
Elachistinae	Elachista nodosae	10ANIC-04743	ANICH746-10	Australian National Insect Collection	Australia	HQ948511
Elachistinae	Elachista nodosae	10ANIC-04735	ANICH738-10	Australian National Insect Collection	Australia	HQ948503
Elachistinae	Elachista nodosae	10ANIC-04740	ANICH743-10	Australian National Insect Collection	Australia	HQ948508
Elachistinae	Elachista nodosae	10ANIC-04736	ANICH739-10	Australian National Insect Collection	Australia	HQ948504
Elachistinae	Elachista nr. ophthalma	MM16926	ELACA1163-11	Finnish Museum of Natural History	Australia	KM373606
Elachistinae	Elachista ophelma	10ANIC-04693	ANICH696-10	Australian National Insect Collection	Australia	HQ948465
Elachistinae	Elachista ophelma	10ANIC-04691	ANICH694-10	Australian National Insect Collection	Australia	HQ948463
Elachistinae	Elachista ophthalma	10ANIC-04792	ANICH795-10	Australian National Insect Collection	Australia	HQ948553
Elachistinae	Elachista ophthalma	10ANIC-04793	ANICH796-10	Australian National Insect Collection	Australia	HQ948554
Elachistinae	Elachista ophthalma	10ANIC-04791	ANICH794-10	Australian National Insect Collection	Australia	HQ948552
Elachistinae	Elachista opima	10ANIC-04523	ANICH526-10	Australian National Insect Collection	Australia	HQ948351
Elachistinae	Elachista paragauda	10ANIC-04724	ANICH727-10	Australian National Insect Collection	Australia	HQ948493
Elachistinae	Elachista paragauda	10ANIC-04723	ANICH726-10	Australian National Insect Collection	Australia	HQ948492
Elachistinae	Elachista paryphoea	10ANIC-04720	ANICH723-10	Australian National Insect Collection	Australia	HQ948489
Elachistinae	Elachista paryphoea	10ANIC-04719	ANICH722-10	Australian National Insect Collection	Australia	HQ948488
Elachistinae	Elachista paryphoea	10ANIC-04718	ANICH721-10	Australian National Insect Collection	Australia	HQ948487
Elachistinae	Elachista patania	10ANIC-04764	ANICH767-10	Australian National Insect Collection	Australia	HQ948530
Elachistinae	Elachista patersoniae	10ANIC-04663	ANICH666-10	Australian National Insect Collection	Australia	HQ948436
Elachistinae	Elachista patersoniae	10ANIC-04666	ANICH669-10	Australian National Insect Collection	Australia	HQ948439
Elachistinae	Elachista patersoniae	10ANIC-04664	ANICH667-10	Australian National Insect Collection	Australia	HQ948437
Elachistinae	Elachista patersoniae	10ANIC-04665	ANICH668-10	Australian National Insect Collection	Australia	HQ948438
Elachistinae	Elachista peridiola	10ANIC-04811	ANICH814-10	Australian National Insect Collection	Australia	HQ948570
Elachistinae	Elachista peridiola	10ANIC-04812	ANICH815-10	Australian National Insect Collection	Australia	HQ948571
Elachistinae	Elachista peridiola	10ANIC-04809	ANICH812-10	Australian National Insect Collection	Australia	HQ948568
Elachistinae	Elachista pharetra	10ANIC-04530	ANICH533-10	Australian National Insect Collection	Australia	HQ948356
Elachistinae	Elachista phascola	10ANIC-04808	ANICH811-10	Australian National Insect Collection	Australia	HQ948567
Elachistinae	Elachista phascola	10ANIC-04807	ANICH810-10	Australian National Insect Collection	Australia	HQ948566
Elachistinae	Elachista physalodes	10ANIC-04815	ANICH818-10	Australian National Insect Collection	Australia	HQ948574
Elachistinae	Elachista physalodes	10ANIC-04814	ANICH817-10	Australian National Insect Collection	Australia	HQ948573
Elachistinae	Elachista physalodes	10ANIC-04813	ANICH816-10	Australian National Insect Collection	Australia	HQ948572
Elachistinae	Elachista platina	10ANIC-04786	ANICH789-10	Australian National Insect Collection	Australia	HQ948548
Elachistinae	Elachista platina	10ANIC-04785	ANICH788-10	Australian National Insect Collection	Australia	HQ948547
Elachistinae	Elachista platysma	10ANIC-04758	ANICH761-10	Australian National Insect Collection	Australia	HQ948525
Elachistinae	Elachista platysma	10ANIC-04760	ANICH763-10	Australian National Insect Collection	Australia	HQ948527
Elachistinae	Elachista polliae	10ANIC-04950	ANICH953-10	Australian National Insect Collection	Australia	HQ948651
Elachistinae	Elachista polliae	10ANIC-04951	ANICH954-10	Australian National Insect Collection	Australia	HQ948652
Elachistinae	Elachista protensa	10ANIC-04778	ANICH781-10	Australian National Insect Collection	Australia	HQ948542
Elachistinae	Elachista ruscella	10ANIC-04761	ANICH764-10	Australian National Insect Collection	Australia	HQ948528
Elachistinae	Elachista sapphirella	10ANIC-04773	ANICH776-10	Australian National Insect Collection	Australia	HQ948539
Elachistinae	Elachista sapphirella	10ANIC-04772	ANICH775-10	Australian National Insect Collection	Australia	HQ948538
Elachistinae	Elachista sarota	10ANIC-04482	ANICH485-10	Australian National Insect Collection	Australia	HQ948316
Elachistinae	Elachista sarota	10ANIC-04481	ANICH484-10	Australian National Insect Collection	Australia	HQ948315
Elachistinae	Elachista scitula	10ANIC-04957	ANICH960-10	Australian National Insect Collection	Australia	HQ948657
Elachistinae	Elachista seductilis	10ANIC-04788	ANICH791-10	Australian National Insect Collection	Australia	HQ948549
Elachistinae	Elachista seductilis	10ANIC-04790	ANICH793-10	Australian National Insect Collection	Australia	HQ948551
Elachistinae	Elachista seductilis	10ANIC-04789	ANICH792-10	Australian National Insect Collection	Australia	HQ948550
Elachistinae	Elachista sp. ANIC1	10ANIC-04667	ANICH670-10	Australian National Insect Collection	Australia	HQ948440
Elachistinae	Elachista sp. ANICLK1	10ANIC-04963	ANICH966-10	Australian National Insect Collection	Australia	HQ948662
Elachistinae	Elachista sp. ANICLK3	10ANIC-04831	ANICH834-10	Australian National Insect Collection	Australia	HQ948588
Elachistinae	Elachista sp. ANICLK4	10ANIC-04971	ANICH974-10	Australian National Insect Collection	Australia	HQ948668
Elachistinae	Elachista sp. ANICLK6	10ANIC-04842	ANICH845-10	Australian National Insect Collection	Australia	HQ948593
Elachistinae	Elachista spathacea	10ANIC-04722	ANICH725-10	Australian National Insect Collection	Australia	HQ948491
Elachistinae	Elachista spathacea	10ANIC-04721	ANICH724-10	Australian National Insect Collection	Australia	HQ948490
Elachistinae	Elachista sphaerella	10ANIC-04839	ANICH842-10	Australian National Insect Collection	Australia	HQ948592
Elachistinae	Elachista spinodora	10ANIC-04537	ANICH540-10	Australian National Insect Collection	Australia	HQ948359
Elachistinae	Elachista spongicola	10ANIC-04476	ANICH479-10	Australian National Insect Collection	Australia	HQ948310
Elachistinae	Elachista spongicola	MM16924	ELACA1161-11	Finnish Museum of Natural History	Australia	KM373629
Elachistinae	Elachista spongicola	10ANIC-04474	ANICH477-10	Australian National Insect Collection	Australia	HQ948308
Elachistinae	Elachista spongicola	10ANIC-04475	ANICH478-10	Australian National Insect Collection	Australia	HQ948309
Elachistinae	Elachista stictifica	10ANIC-04497	ANICH500-10	Australian National Insect Collection	Australia	HQ948331
Elachistinae	Elachista stictifica	10ANIC-04496	ANICH499-10	Australian National Insect Collection	Australia	HQ948330
Elachistinae	Elachista stictifica	MM16915	ELACA1152-11	Finnish Museum of Natural History	Australia	KM373627
Elachistinae	Elachista strenua	10ANIC-04800	ANICH803-10	Australian National Insect Collection	Australia	HQ948560
Elachistinae	Elachista strenua	10ANIC-04795	ANICH798-10	Australian National Insect Collection	Australia	HQ948555
Elachistinae	Elachista strenua	10ANIC-04797	ANICH800-10	Australian National Insect Collection	Australia	HQ948557
Elachistinae	Elachista strenua	10ANIC-04796	ANICH799-10	Australian National Insect Collection	Australia	HQ948556
Elachistinae	Elachista synethes	10ANIC-04805	ANICH808-10	Australian National Insect Collection	Australia	JF840434
Elachistinae	Elachista synethes	10ANIC-04801	ANICH804-10	Australian National Insect Collection	Australia	HQ948561
Elachistinae	Elachista synethes	05-NSW-00421	LNSWA421-05	New South Wales Department of Primary Industries	Australia	KM373614
Elachistinae	Elachista synethes	10ANIC-04836	ANICH839-10	Australian National Insect Collection	Australia	HQ948591
Elachistinae	Elachista synethes	10ANIC-04802	ANICH805-10	Australian National Insect Collection	Australia	HQ948562
Elachistinae	Elachista synethes	10ANIC-04804	ANICH807-10	Australian National Insect Collection	Australia	HQ948564
Elachistinae	Elachista tetraquetri	10ANIC-04486	ANICH489-10	Australian National Insect Collection	Australia	HQ948320
Elachistinae	Elachista toralis	10ANIC-04730	ANICH733-10	Australian National Insect Collection	Australia	HQ948498
Elachistinae	Elachista toralis	10ANIC-04728	ANICH731-10	Australian National Insect Collection	Australia	HQ948496
Elachistinae	Elachista toralis	10ANIC-04729	ANICH732-10	Australian National Insect Collection	Australia	HQ948497
Elachistinae	Elachista toryna	MM16929	ELACA1166-11	Finnish Museum of Natural History	Australia	KM373592
Elachistinae	Elachista toryna	10ANIC-04511	ANICH514-10	Australian National Insect Collection	Australia	HQ948341
Elachistinae	Elachista toryna	10ANIC-04512	ANICH515-10	Australian National Insect Collection	Australia	HQ948342
Elachistinae	Elachista velox	10ANIC-04557	ANICH560-10	Australian National Insect Collection	Australia	HQ948369
Elachistinae	Elachista velox	10ANIC-04834	ANICH837-10	Australian National Insect Collection	Australia	HQ948590
Elachistinae	Elachista velox	10ANIC-04803	ANICH806-10	Australian National Insect Collection	Australia	HQ948563
Elachistinae	Elachista velox	10ANIC-04556	ANICH559-10	Australian National Insect Collection	Australia	HQ948368
Elachistinae	Elachista velutina	10ANIC-04690	ANICH693-10	Australian National Insect Collection	Australia	HQ948462
Elachistinae	Elachista velutina	10ANIC-04686	ANICH689-10	Australian National Insect Collection	Australia	HQ948458
Elachistinae	Elachista velutina	10ANIC-04689	ANICH692-10	Australian National Insect Collection	Australia	HQ948461
Elachistinae	Elachista velutina	10ANIC-04687	ANICH690-10	Australian National Insect Collection	Australia	HQ948459
Elachistinae	Elachista velutina	10ANIC-04685	ANICH688-10	Australian National Insect Collection	Australia	HQ948457
Elachistinae	Elachista velutina	10ANIC-04688	ANICH691-10	Australian National Insect Collection	Australia	HQ948460
Elachistinae	Elachista zophosema	MM16910	ELACA1147-11	Finnish Museum of Natural History	Australia	KM373620
Elachistinae	Elachista zophosema	10ANIC-04554	ANICH557-10	Australian National Insect Collection	Australia	HQ948367
Elachistinae	Elachista zophosema	MM16909	ELACA1146-11	Finnish Museum of Natural History	Australia	KM373594
Elachistinae	Perittia daleris	10ANIC-04470	ANICH473-10	Australian National Insect Collection	Australia	HQ948306
Elachistinae	Perittia daleris	10ANIC-04471	ANICH474-10	Australian National Insect Collection	Australia	HQ948307
