# Supplementary material for: Delineating Species with DNA Barcodes: A Case of Taxon Dependent Method Performance in Moths
Source: PLoS One. 2015 Apr 7;10(4):e0122481. doi: 10.1371/journal.pone.0122481 (PMC4406103; doi:10.1371/journal.pone.0122481)
Supplement: S4 Table — Elachista lachnella is included, because it was merged in the same BIN with E. nodosae. (XLSX) [file pone.0122481.s004.xlsx]

## Sheet: Sheet1
Subfamily	Identification	Result in this study	Result on BOLD	BIN URI(S)	Member Count (public records)	Collection locations	Notes
Gelechiinae	Caryocolum amaurella	SPLIT	SPLIT	BOLD:AAE9474	4	Finland
				BOLD:AAE9473	1	Finland
Gelechiinae	Chionodes distinctella	SPLIT	SPLIT	BOLD:AAE9035	3	Finland
				BOLD:AAE9034	10	Finland, Germany, Italy
				BOLD:ACF0625	4	Finland, Germany
Gelechiinae	Chionodes fumatella	SPLIT	SPLIT	BOLD:AAC7811	30	Finland, France, Macedonia, Norway, Romania, Austria, Germany, Italy, Bulgaria	One specimen identified as Neofriseria peliella
				BOLD:AAI4278	14	Finland, Canada
Gelechiinae	Gnorimoschema herbichii	SPLIT	SPLIT	BOLD:AAA6744	54	Finland, Canada, Denmark, Latvia
				BOLD:AAL5587	2	Finland
Gelechiinae	Neofriseria peliella	SPLIT	SPLIT	BOLD:AAC7812	24	Finland, Norway, United Kingdom, Germany, Spain, Austria	One specimen identified as Neofriseria singula
				BOLD:ABZ1425	10	Finland, Italy, Macedonia
Gelechiinae	Scrobipalpa bryophiloides	SPLIT	SPLIT	BOLD:AAQ3427	1	Russia
				BOLD:AAQ3428	1	Russia
Gelechiinae	Scrobipalpa artemisiella	MERGE	MERGE	BOLD:AAE9838	31	Finland, United Kingdom, Germany, Italy, Spain, Austria, Macedonia, Russia	26 specimens identified as S. artemisiella, 4 specimens identified as S. stangei
Gelechiinae	Scrobipalpa stangei	MERGE	MERGE	BOLD:AAE9838	31	Finland, United Kingdom, Germany, Italy, Spain, Austria, Macedonia, Russia	27 specimens identified as S. artemisiella, 4 specimens identified as S. stangei
Elachistinae	Elachista cylistica	MERGE	MERGE	BOLD:AAN3056	17	Australia	3 specs. idenfied as E. paryphoea, 3 specs. idenfied as E. paragauda, 3 specs. idenfied as E. toralis, 2 specs. idenfied as E. etorella, 2 specs. idenfied as E. faberella, 2 specs. idenfied as E. spathacea, one spec. identified as E. cylistica
Elachistinae	Elachista etorella	MIXTURE	MIXTURE	BOLD:AAN3055	21	Australia	12 specs. identified as E. etorella, 4 specs. identified as E. spongicola, 3 specs. identified as E. gladiograpta, 2 specs. identified as E. gladiatrix
				BOLD:AAN3056	17	Australia	3 specs. idenfied as E. paryphoea, 3 specs. idenfied as E. paragauda, 3 specs. idenfied as E. toralis, 2 specs. idenfied as E. etorella, 2 specs. idenfied as E. faberella, 2 specs. idenfied as E. spathacea, one spec. identified as E. cylistica
Elachistinae	Elachista faberella	MERGE	MERGE	BOLD:AAN3056	17	Australia	3 specs. idenfied as E. paryphoea, 3 specs. idenfied as E. paragauda, 3 specs. idenfied as E. toralis, 2 specs. idenfied as E. etorella, 2 specs. idenfied as E. faberella, 2 specs. idenfied as E. spathacea, one spec. identified as E. cylistica
Elachistinae	Elachista gladiatrix	MERGE	MERGE	BOLD:AAN3055	21	Australia	12 specs. identified as E. etorella, 4 specs. identified as E. spongicola, 3 specs. identified as E. gladiograpta, 2 specs. identified as E. gladiatrix
Elachistinae	Elachista gladiograpta	MERGE	MERGE	BOLD:AAN3055	21	Australia	12 specs. identified as E. etorella, 4 specs. identified as E. spongicola, 3 specs. identified as E. gladiograpta, 2 specs. identified as E. gladiatrix
Elachistinae	Elachista paragauda	MERGE	MERGE	BOLD:AAN3056	17	Australia	3 specs. idenfied as E. paryphoea, 3 specs. idenfied as E. paragauda, 3 specs. idenfied as E. toralis, 2 specs. idenfied as E. etorella, 2 specs. idenfied as E. faberella, 2 specs. idenfied as E. spathacea, one spec. identified as E. cylistica
Elachistinae	Elachista paryphoea	MERGE	MERGE	BOLD:AAN3056	17	Australia	3 specs. idenfied as E. paryphoea, 3 specs. idenfied as E. paragauda, 3 specs. idenfied as E. toralis, 2 specs. idenfied as E. etorella, 2 specs. idenfied as E. faberella, 2 specs. idenfied as E. spathacea, one spec identified as E. cylistica
Elachistinae	Elachista spathacea	MERGE	MERGE	BOLD:AAN3056	17	Australia	3 specs. idenfied as E. paryphoea, 3 specs. idenfied as E. paragauda, 3 specs. idenfied as E. toralis, 2 specs. idenfied as E. etorella, 2 specs. idenfied as E. faberella, 2 specs. idenfied as E. spathacea, one spec. identified as E. cylistica
Elachistinae	Elachista spongicola	MERGE	MERGE	BOLD:AAN3055	21	Australia	12 specs. identified as E. etorella, 4 specs. identified as E. spongicola, 3 specs. identified as E. gladiograpta, 2 specs. identified as E. gladiatrix
Elachistinae	Elachista toralis	MERGE	MERGE	BOLD:AAN3056	17	Australia	3 specs. idenfied as E. paryphoea, 3 specs. idenfied as E. paragauda, 3 specs. idenfied as E. toralis, 2 specs. idenfied as E. etorella, 2 specs. idenfied as E. faberella, 2 specs. idenfied as E. spathacea, one spec. identified as E. cylistica
Elachistinae	Elachista deusta	MERGE	MERGE	BOLD:AAN3617	12	Australia	4 specs. identified as E. flavicilia, 4 specs. identified as E. effusi, 3 specs. identified as E. deusta, one spec. identified as E. tetraquetri
Elachistinae	Elachista effusi	MERGE	MERGE	BOLD:AAN3617	12	Australia	4 specs. identified as E. flavicilia, 4 specs. identified as E. effusi, 3 specs. identified as E. deusta, one spec. identified as E. tetraquetri
Elachistinae	Elachista flavicilia	MERGE	MERGE	BOLD:AAN3617	12	Australia	4 specs. identified as E. flavicilia, 4 specs. identified as E. effusi, 3 specs. identified as E. deusta, one spec. identified as E. tetraquetri
Elachistinae	Elachista tetraquetri	MERGE	MERGE	BOLD:AAN3617	12	Australia	4 specs. identified as E. flavicilia, 4 specs. identified as E. effusi, 3 specs. identified as E. deusta, one spec. identified as E. tetraquetri
Elachistinae	Elachista lachnella	MATCH	MERGE	BOLD:ACF2542	6	Australia	3 specs. identified as E. lachnella, 3 specs. identified as E. nodosae
Elachistinae	Elachista melanthes	MIXTURE	MIXTURE	BOLD:AAN4062	13	Australia	7 specs. identified as E. nodosae, 6 specs. identified as E. melanthes
				BOLD:AAO6772	1	Australia
Elachistinae	Elachista nodosae	MIXTURE	MIXTURE	BOLD:ACF2542	6	Australia	3 specs. identified as E. lachnella, 3 specs. identified as E. nodosae
				BOLD:AAN4062	13	Australia	7 specs. identified as E. nodosae, 6 specs. identified as E. melanthes
Elachistinae	Elachista anolba	MERGE	MERGE	BOLD:AAO6802	3	Australia	2 specs. identified as E. averta, one spec. identified as E. anolba
Elachistinae	Elachista averta	MERGE	MERGE	BOLD:AAO6802	3	Australia	2 specs. identified as E. averta, one spec. identified as E. anolba
Elachistinae	Elachista catagma	MERGE	MERGE	BOLD:AAN4025	6	Australia	3 specs. identified as E. catagma, 3 specs. identified as E. ophelma
Elachistinae	Elachista ophelma	MERGE	MERGE	BOLD:AAN4025	6	Australia	3 specs. identified as E. catagma, 3 specs. identified as E. ophelma
Elachistinae	Elachista gerasmia	MIXTURE	MERGE	BOLD:AAN3614	10	Australia	6 specs. identified as E. gerasmia, 3 specimens identified as E. physalodes
Elachistinae	Elachista physalodes	MERGE	MERGE	BOLD:AAN3614	10	Australia	6 specs. identified as E. gerasmia, 3 specimens identified as E. physalodes
Elachistinae	Elachista litharga	MERGE	MERGE	BOLD:ABZ7816	6	Australia	3 specs. identified as E. litharga, 3 specs. identified as E. zophosema
Elachistinae	Elachista zophosema	MERGE	MERGE	BOLD:ABZ7816	6	Australia	3 specs. identified as E. litharga, 3 specs. identified as E. zophosema
Elachistinae	Elachista platysma	MERGE	MERGE	BOLD:ABX6479	6	Australia	3 specs. identified as E. platysma, 3 specs. identified as E. stictifica
Elachistinae	Elachista stictifica	MERGE	MERGE	BOLD:ABX6479	6	Australia	3 specs. identified as E. platysma, 3 specs. identified as E. stictifica
Elachistinae	Elachista ophthalma	MERGE	MERGE	BOLD:AAO2995	4	Australia	3 specs. identified as E. ophthalma, one spec. identified as E. nr. ophthalma
Elachistinae	Elachista nr. ophthalma	MERGE	MERGE	BOLD:AAO2995	4	Australia	3 specs. identified as E. ophthalma, one spec. identified as E. nr. ophthalma
Elachistinae	Elachista sp. ANICLK1	MERGE	MERGE	BOLD:ACF3790	2	Australia	One spec. identified as E. sp. ANICLK1, one spec. identified as E. sp. ANICLK3
Elachistinae	Elachista sp. ANICLK3	MERGE	MERGE	BOLD:ACF3790	2	Australia	One spec. identified as E. sp. ANICLK1, one spec. identified as E. sp. ANICLK3
Elachistinae	Elachista carcharota	SPLIT	SPLIT	BOLD:AAO9042	2	Australia
				BOLD:AAO9041	1	Australia
Elachistinae	Elachista discina	SPLIT	SPLIT	BOLD:AAN3168	4	Australia
				BOLD:ACE4841	2	Australia
